# Supplementary material
Source: PubMed Central journal article supplement (PMC3507369)
Supplement: 23.12.2042_ASN2012060554SupplementaryData.pdf [file 23.12.2042_ASN2012060554SupplementaryData.pdf]

**Supplemental Table 1:** Additional baseline covariates in the unmatched and propensity-score matched cohorts

|                                      | Full Cohort       |                | p       | Matched Cohort |               | p    |
|--------------------------------------|-------------------|----------------|---------|----------------|---------------|------|
|                                      | CABG<br>N= 14,316 | PCI<br>N= 7665 |         | CABG<br>N=7049 | PCI<br>N=7049 |      |
| Intracranial atherosclerotic disease | 12.3              | 10.1           | <0.0001 | 10.0           | 10.2          | 0.8  |
| Intracranial hemorrhage              | 0.3               | 0.6            | 0.004   | 0.5            | 0.5           | >0.9 |
| Peptic ulcer disease                 | 1.8               | 1.5            | 0.2     | 1.5            | 1.5           | 0.9  |
| Gastrointestinal bleed               | 6.6               | 7.6            | 0.005   | 7.3            | 7.2           | 0.8  |
| Rheumatologic disease                | 1.6               | 2.1            | 0.007   | 1.8            | 1.8           | 0.8  |
| Pulmonary hypertension               | 2.4               | 3.2            | 0.0006  | 2.9            | 3.0           | 0.5  |
| Paralysis                            | 1.0               | 1.4            | 0.004   | 1.2            | 1.2           | 0.9  |
| Psychosis                            | 1.7               | 2.3            | 0.003   | 2.1            | 2.0           | 0.8  |
| Alcohol                              | 0.7               | 0.7            | >0.9    | 0.6            | 0.7           | 0.7  |
| Drug abuse                           | 1.0               | 1.0            | 0.7     | 1.9            | 1.0           | 0.8  |
| Hypothyroidism                       | 6.0               | 8.0            | <0.0001 | 7.6            | 7.4           | 0.6  |
| Human immunodeficiency virus         | 0.3               | 0.6            | 0.009   | 0.4            | 0.5           | 0.5  |
| Hypernatremia                        | 0.4               | 0.4            | 0.5     | 0.3            | 0.4           | 0.8  |
| Hyponatremia                         | 3.0               | 4.0            | 0.002   | 3.4            | 3.5           | 0.7  |
| Hyperkalemia                         | 12.1              | 15.0           | <0.0001 | 13.7           | 13.8          | 0.8  |
| Hypokalemia                          | 3.0               | 4.2            | <0.0001 | 3.7            | 3.7           | 0.9  |
| Acidosis                             | 2.2               | 2.6            | 0.06    | 2.3            | 2.5           | 0.5  |
| Alkalosis                            | 0.3               | 0.4            | 0.5     | 0.4            | 0.4           | 0.9  |
| Mixed acid base                      | 0.3               | 0.3            | 0.8     | 0.3            | 0.2           | 0.7  |
| Hypercalcemia                        | 2.1               | 2.4            | 0.1     | 2.5            | 2.4           | 0.6  |
| Hypocalcemia                         | 3.5               | 3.2            | 0.2     | 3.2            | 3.2           | 0.9  |
| Hyperparathyroidism                  | 6.9               | 5.9            | 0.008   | 6.0            | 6.1           | 0.9  |
| Phosphate disorders                  | 3.3               | 3.4            | 0.8     | 3.2            | 3.3           | >0.9 |
| Magnesium disorder                   | 1.5               | 1.3            | 0.5     | 1.2            | 1.3           | 0.6  |

**Supplemental Table 2:** Top twenty predictors for receipt of coronary artery bypass grafting versus percutaneous coronary intervention.

| Variable                                    | Estimate | Standard Error | Wald Chi-Sq | Odds Ratio | Lower 95% CI | Upper 95% CI |
|---------------------------------------------|----------|----------------|-------------|------------|--------------|--------------|
| Index year (per 1 year increase from 1997)  | -0.1059  | 0.00457        | 536.7701    | 0.899      | 0.891        | 0.908        |
| Cerebral atherosclerotic disease            | 0.5031   | 0.0528         | 90.8489     | 1.654      | 1.491        | 1.834        |
| Age, per 10 years                           | -0.1363  | 0.0148         | 84.5999     | 0.873      | 0.848        | 0.898        |
| Utilized skilled nursing facility           | -0.5308  | 0.06           | 78.197      | 0.588      | 0.523        | 0.662        |
| Female Sex                                  | -0.1349  | 0.0155         | 75.422      | 0.763      | 0.718        | 0.811        |
| History of myocardial infarction            | 0.3305   | 0.0431         | 58.8353     | 1.392      | 1.279        | 1.514        |
| Angina                                      | 0.2756   | 0.0369         | 55.7341     | 1.317      | 1.225        | 1.416        |
| Hyperlipidemia                              | 0.191    | 0.036          | 28.1788     | 1.21       | 1.128        | 1.299        |
| Atrial fibrillation / flutter               | -0.243   | 0.0492         | 24.3672     | 0.784      | 0.712        | 0.864        |
| History of failed kidney transplant         | -0.343   | 0.0709         | 23.3895     | 0.71       | 0.618        | 0.815        |
| Dementia                                    | -0.4429  | 0.1006         | 19.4009     | 0.642      | 0.527        | 0.782        |
| Number of non-nephrology visits             | -0.00469 | 0.00109        | 18.627      | 0.995      | 0.993        | 0.997        |
| Hospital days (per quartile increase)       | -0.077   | 0.0185         | 17.3787     | 0.926      | 0.893        | 0.96         |
| Myocardial infarction on index presentation | -0.1464  | 0.0353         | 17.1679     | 0.864      | 0.806        | 0.926        |
| Black race vs. Other race                   | -0.0998  | 0.0297         | 11.2531     | 0.804      | 0.704        | 0.918        |
| Lung Disease                                | -0.1332  | 0.0406         | 10.7492     | 0.875      | 0.808        | 0.948        |
| Hypertension                                | 0.1396   | 0.0433         | 10.3704     | 1.15       | 1.056        | 1.252        |
| HIV                                         | -0.7151  | 0.2262         | 9.9966      | 0.489      | 0.314        | 0.762        |
| Hyperkalemia                                | -0.1465  | 0.0464         | 9.95        | 0.864      | 0.789        | 0.946        |
| Peripheral vascular disease                 | -0.1056  | 0.0358         | 8.7277      | 0.9        | 0.839        | 0.965        |

**Supplemental Table 3: ICD-9 Codes used to identify comorbid conditions**

| Comorbidity                          | ICD-9 Codes                                                                                                                                                                                                                         |
|--------------------------------------|-------------------------------------------------------------------------------------------------------------------------------------------------------------------------------------------------------------------------------------|
| <b>Cardiovascular</b>                |                                                                                                                                                                                                                                     |
| Atrial fibrillation                  | 427.3x                                                                                                                                                                                                                              |
| Prior myocardial infarction          | 410.x, 412                                                                                                                                                                                                                          |
| Arrhythmia                           | 426.x, 427.0, 427.20, 427.81, 427.9                                                                                                                                                                                                 |
| Heart failure                        | 398.91, 402.01, 402.11, 402.91, 404.01, 404.03, 404.13, 404.91, 428.x,                                                                                                                                                              |
| Hypertension                         | 401.0, 401.1, 401.9, 402.x, 403.x, 404.x, 405.x                                                                                                                                                                                     |
| Pacemaker                            | 37.7x, 37.8x, 996.01, v45.00, v45.01, v45.02, v45.09, v53.31                                                                                                                                                                        |
| Stroke                               | 433.x, 434.x, 436.00                                                                                                                                                                                                                |
| Transient ischemic attack            | 435.x                                                                                                                                                                                                                               |
| Angina                               | 411.x, 413.x                                                                                                                                                                                                                        |
| Valvular disease                     | 394.x-397.1, 424.x, 746.3-746.6, v42.2, v43.3                                                                                                                                                                                       |
| Ventricular fibrillation             | 427.1, 427.4x                                                                                                                                                                                                                       |
| Implantable cardiac defibrillator    | 37.9x, 996.04, v53.32                                                                                                                                                                                                               |
| Peripheral vascular disease          | 38.03, 38.04, 38.05, 38.08, 38.33-38.48, 39.22-39.29, 440.2x, 440.3x, 440.4x, 441.x, 443.x, 445.x, 447.10, 557.10, 557.90, v43.4,                                                                                                   |
| Pulmonary hypertension               | 416.x, 417.9                                                                                                                                                                                                                        |
| Intracranial atherosclerotic disease | 433.x, 434.x, 437.x, 438x.                                                                                                                                                                                                          |
| <b>Other Medical</b>                 |                                                                                                                                                                                                                                     |
| Diabetes mellitus                    | 249.x, 250.x, 357.2, 362.0x                                                                                                                                                                                                         |
| Hyperlipidemia                       | 272.x                                                                                                                                                                                                                               |
| Chronic liver disease                | 070.x, 456.1, 456.21, 570-573.x, v42.7                                                                                                                                                                                              |
| Peptic ulcer disease                 | 531.7, 531.0, 531.71, 531.9, 531.90, 531.91, 532.7, 532.70, 532.71, 532.9x, 533.7x, 534.7x, 534.9x                                                                                                                                  |
| Gastrointestinal bleed               | 456.00, 456.0, 456.20, 530.21, 530.70, 530.82, 531.0x, 531.2x, 531.4x, 531.6x, 532.2x, 532.4x, 532.6x, 533.0x, 533.2x, 534.0x, 534.2x, 534.4x, 534.6x, 535.x1, 537.83, 537.84, 562.02, 562.03, 562.12, 562.13, 569.3, 569.85, 578.x |
| Intracranial hemorrhage              | 430, 431.00, 432.x                                                                                                                                                                                                                  |
| Chronic lung disease                 | 490, 491.x-496, 500-505, 506.4, 516.x                                                                                                                                                                                               |
| Systemic cancer                      | 140.x-165.x, 170.x-172.x, 174.x, 175.x, 180.x-209.x, 238.6, 273.3                                                                                                                                                                   |
| Dementia                             | 290.x, 294.1x, 331.x                                                                                                                                                                                                                |
| Depression                           | 296.2x, 296.3x, 296.5x, 296.82, 300.40, 301.12, 309.0, 309.10, 311                                                                                                                                                                  |
| Paralysis                            | 342.x, 343.x, 344.x                                                                                                                                                                                                                 |
| Human immunodeficiency virus         | 042, 043, 044                                                                                                                                                                                                                       |
| Rheumatologic disease                | 701.x, 714.x, 720.x, 725.00                                                                                                                                                                                                         |
| Psychosis                            | 295.x, 296.x, 297.x, 298.x, 299.1, 299.10, 299.11                                                                                                                                                                                   |
| Tobacco use                          | 305.1x                                                                                                                                                                                                                              |
| Alcohol                              | 291.x, 303.x, 305.x                                                                                                                                                                                                                 |
| Drug abuse                           | 292.x, 304.x, 305.x,                                                                                                                                                                                                                |
| Obesity                              | 278.0x, 649.1x, v85.3x, v85.4                                                                                                                                                                                                       |
| <b>Electrolyte/Metabolic</b>         |                                                                                                                                                                                                                                     |
| Hyper-/ hyponatremia                 | 276.0, 276.10                                                                                                                                                                                                                       |
| Hyper-/hypokalemia                   | 276.70, 276.80                                                                                                                                                                                                                      |
| Acid/base disorders                  | 276.20, 276.30, 276.40                                                                                                                                                                                                              |
| Hyper- hypocalcemia                  | 275.4, 275.41                                                                                                                                                                                                                       |
| Hyperparathyroidism                  | 252.0x                                                                                                                                                                                                                              |
| Phosphate disorders                  | 275.30                                                                                                                                                                                                                              |
| Magnesium disorder                   | 275.20                                                                                                                                                                                                                              |
| Hypothyroidism                       | 243, 244.x                                                                                                                                                                                                                          |
